# Supplementary material
Source: Springer Nature journal article supplement (https://www.springermedizin.de/resource/supplementary/12936_2007_359_MOESM2_ESM.pdf/9547634)
Supplement: MOESM2 [file 9547634]

Screened  
513

Exclusions 137  
131 negative  
2 *plasmodium malariae*  
2 *plasmodium ovale*  
2 mixed

*Pf* Mono-infection  
376

Exclusions 156  
50 parasitaemia < 2.000 Trophozoites/uL  
28 parasitaemia > 200.000 Trophozoites/uL  
10 concomitant febrile condition  
4 no consent  
3 severe anemia  
2 severe malaria  
1 oral treatment non possible  
58 limitations of inclusions for operational reasons

Inclusions  
220

AS/AQ  
110

AS/SP  
110

1 Lost of Follow up (LFU)

1 excluded: self-medication

Exclusions 4  
-2 vomiting study doses  
-1 protocol violation  
-1 serious febrile illness

Analyzed at J14  
108

Analyzed à J14  
106

1 LFU

Analyzed at J28  
107

Analyzed at J28  
106
